# Supplementary material for: Investigating the antiangiogenic potential of Rumex vesicarius (humeidh), anticancer activity in cancer cell lines and assessment of developmental toxicity in zebrafish embryos
Source: PubMed Central journal article supplement — Saudi J Biol Sci. 2019 Dec 6;27(2):611–22. doi: 10.1016/j.sjbs.2019.11.042 (PMC6997907; doi:10.1016/j.sjbs.2019.11.042), 2019-12-06
Supplement: mmc1.pdf [file mmc1.pdf]

## SwissTargetPrediction

| Target                                                | Common name  | Uniprot ID       | ChEMBL ID     | Target Class                        | Probability*   | Known actives (3D/2D) |
|-------------------------------------------------------|--------------|------------------|---------------|-------------------------------------|----------------|-----------------------|
| Leucine-rich repeat serine/threonine-protein kinase 2 | LRRK2        | Q5S007           | CHEMBL1075104 | Kinase                              | 0.112041901328 | 134 / 0               |
| Adenosine A1 receptor                                 | ADORA1       | P30542           | CHEMBL226     | Family A G protein-coupled receptor | 0.112041901328 | 161 / 0               |
| Adenosine A2a receptor                                | ADORA2A      | P29274           | CHEMBL251     | Family A G protein-coupled receptor | 0.112041901328 | 157 / 0               |
| Adenosine A2b receptor                                | ADORA2B      | P29275           | CHEMBL255     | Family A G protein-coupled receptor | 0.112041901328 | 67 / 0                |
| Adenosine A3 receptor                                 | ADORA3       | P0DMS8           | CHEMBL256     | Family A G protein-coupled receptor | 0.112041901328 | 115 / 0               |
| FK506-binding protein 1A                              | FKBP1A       | P62942           | CHEMBL1902    | Isomerase                           | 0.112041901328 | 14 / 0                |
| Tyrosine-protein kinase JAK3                          | JAK3         | P52333           | CHEMBL2148    | Kinase                              | 0.112041901328 | 114 / 0               |
| Tyrosine-protein kinase JAK1                          | JAK1         | P23458           | CHEMBL2835    | Kinase                              | 0.112041901328 | 98 / 0                |
| Tyrosine-protein kinase JAK2                          | JAK2         | O60674           | CHEMBL2971    | Kinase                              | 0.112041901328 | 146 / 0               |
| Muscarinic acetylcholine receptor M4                  | CHRM4        | P08173           | CHEMBL1821    | Family A G protein-coupled receptor | 0.112041901328 | 19 / 0                |
| Muscarinic acetylcholine receptor M5                  | CHRM5        | P08912           | CHEMBL2035    | Family A G protein-coupled receptor | 0.112041901328 | 16 / 0                |
| Muscarinic acetylcholine receptor M2                  | CHRM2        | P08172           | CHEMBL211     | Family A G protein-coupled receptor | 0.112041901328 | 47 / 0                |
| Muscarinic acetylcholine receptor M1                  | CHRM1        | P11229           | CHEMBL216     | Family A G protein-coupled receptor | 0.112041901328 | 47 / 0                |
| Interleukin-8 receptor B                              | CXCR2        | P25025           | CHEMBL2434    | Family A G protein-coupled receptor | 0.112041901328 | 135 / 0               |
| Muscarinic acetylcholine receptor M3                  | CHRM3        | P20309           | CHEMBL245     | Family A G protein-coupled receptor | 0.112041901328 | 45 / 0                |
| Glycogen synthase kinase-3 beta                       | GSK3B        | P49841           | CHEMBL262     | Kinase                              | 0.112041901328 | 94 / 0                |
| Glycogen synthase kinase-3 alpha                      | GSK3A        | P49840           | CHEMBL2850    | Kinase                              | 0.112041901328 | 14 / 0                |
| JAK3/JAK1                                             | JAK3<br>JAK1 | P52333<br>P23458 | CHEMBL3038491 | Kinase                              | 0.112041901328 | 1 / 0                 |
| Indoleamine 2,3-dioxygenase                           | IDO1         | P14902           | CHEMBL4685    | Enzyme                              | 0.112041901328 | 18 / 0                |
| Vascular endothelial growth factor receptor 2         | KDR          | P35968           | CHEMBL279     | Kinase                              | 0.112041901328 | 185 / 0               |
| Phosphodiesterase 10A                                 | PDE10A       | Q9Y233           | CHEMBL4409    | Phosphodiesterase                   | 0.112041901328 | 383 / 0               |
| Dual specificity mitogen-activated                    | MAP2K1       | Q02750           | CHEMBL3587    | Kinase                              | 0.112041901328 | 101 / 0               |
