# Supplementary material for: Investigating the antiangiogenic potential of Rumex vesicarius (humeidh), anticancer activity in cancer cell lines and assessment of developmental toxicity in zebrafish embryos
Source: PubMed Central journal article supplement — Saudi J Biol Sci. 2019 Dec 6;27(2):611–22. doi: 10.1016/j.sjbs.2019.11.042 (PMC6997907; doi:10.1016/j.sjbs.2019.11.042), 2019-12-06
Supplement: mmc2.pdf [file mmc2.pdf]

## SwissTargetPrediction

| Target                                                           | Common name            | Uniprot ID                 | ChEMBL ID     | Target Class                        | Probability*    | Known actives (3D/2D) |
|------------------------------------------------------------------|------------------------|----------------------------|---------------|-------------------------------------|-----------------|-----------------------|
| c-Jun N-terminal kinase 1                                        | MAPK8                  | P45983                     | CHEMBL2276    | Kinase                              | 0.0604245879294 | 118 / 0               |
| c-Jun N-terminal kinase 3                                        | MAPK10                 | P53779                     | CHEMBL2637    | Kinase                              | 0.0604245879294 | 94 / 0                |
| c-Jun N-terminal kinase 2                                        | MAPK9                  | P45984                     | CHEMBL4179    | Kinase                              | 0.0604245879294 | 72 / 0                |
| Phosphodiesterase 5A                                             | PDE5A                  | O76074                     | CHEMBL1827    | Phosphodiesterase                   | 0.0604245879294 | 143 / 0               |
| Serine/threonine protein phosphatase PP1-alpha catalytic subunit | PPP1CA                 | P62136                     | CHEMBL2164    | Phosphatase                         | 0.0604245879294 | 8 / 0                 |
| Adenosine A1 receptor (by homology)                              | ADORA1                 | P30542                     | CHEMBL226     | Family A G protein-coupled receptor | 0.0604245879294 | 444 / 0               |
| Tyrosine-protein kinase JAK3                                     | JAK3                   | P52333                     | CHEMBL2148    | Kinase                              | 0.0604245879294 | 249 / 0               |
| Tyrosine-protein kinase JAK2                                     | JAK2                   | O60674                     | CHEMBL2971    | Kinase                              | 0.0604245879294 | 231 / 0               |
| Norepinephrine transporter                                       | SLC6A2                 | P23975                     | CHEMBL222     | Electrochemical transporter         | 0.0604245879294 | 7 / 0                 |
| Arachidonate 5-lipoxygenase                                      | ALOX5                  | P09917                     | CHEMBL215     | Oxidoreductase                      | 0.0604245879294 | 56 / 0                |
| Carbonic anhydrase I                                             | CA1                    | P00915                     | CHEMBL261     | Lyase                               | 0.0604245879294 | 159 / 0               |
| Carbonic anhydrase IX                                            | CA9                    | Q16790                     | CHEMBL3594    | Lyase                               | 0.0604245879294 | 147 / 0               |
| Tyrosine-protein kinase receptor FLT3                            | FLT3                   | P36888                     | CHEMBL1974    | Kinase                              | 0.0604245879294 | 46 / 0                |
| Cyclin-dependent kinase 2/cyclin A                               | CDK2<br>CCNA1<br>CCNA2 | P24941<br>P78396<br>P20248 | CHEMBL2094128 | Other cytosolic protein             | 0.0604245879294 | 85 / 0                |
| Cyclin-dependent kinase 2                                        | CDK2                   | P24941                     | CHEMBL301     | Kinase                              | 0.0604245879294 | 112 / 0               |
| Calcium-activated potassium channel subunit alpha-1              | KCNMA1                 | Q12791                     | CHEMBL4304    | Voltage-gated ion channel           | 0.0604245879294 | 15 / 0                |
| Macrophage migration inhibitory factor                           | MIF                    | P14174                     | CHEMBL2085    | Enzyme                              | 0.0604245879294 | 7 / 0                 |
| Caspase-6                                                        | CASP6                  | P55212                     | CHEMBL3308    | Protease                            | 0.0604245879294 | 3 / 0                 |
| Steryl-sulfatase                                                 | STS                    | P08842                     | CHEMBL3559    | Enzyme                              | 0.0604245879294 | 5 / 0                 |
| p53-binding protein Mdm-2                                        | MDM2                   | Q00987                     | CHEMBL5023    | Other nuclear protein               | 0.0604245879294 | 26 / 0                |
| Cathepsin K                                                      | CTSK                   | P43235                     | CHEMBL268     | Protease                            | 0.0604245879294 | 132 / 0               |
| Metabotropic glutamate receptor 4                                | GRM4                   | Q14833                     | CHEMBL2736    | Family C G protein-coupled receptor | 0.0604245879294 | 61 / 0                |
