# Supplementary material for: Investigating the antiangiogenic potential of Rumex vesicarius (humeidh), anticancer activity in cancer cell lines and assessment of developmental toxicity in zebrafish embryos
Source: PubMed Central journal article supplement — Saudi J Biol Sci. 2019 Dec 6;27(2):611–22. doi: 10.1016/j.sjbs.2019.11.042 (PMC6997907; doi:10.1016/j.sjbs.2019.11.042), 2019-12-06
Supplement: mmc3.pdf [file mmc3.pdf]

## SwissTargetPrediction

| Target                                                | Common name | Uniprot ID | ChEMBL ID     | Target Class                        | Probability*   | Known actives (3D/2D) |
|-------------------------------------------------------|-------------|------------|---------------|-------------------------------------|----------------|-----------------------|
| p53-binding protein Mdm-2                             | MDM2        | Q00987     | CHEMBL5023    | Other nuclear protein               | 0.112041901328 | 32 / 0                |
| Presenilin 1                                          | PSEN1       | P49768     | CHEMBL2473    | Other ion channel                   | 0.112041901328 | 1 / 0                 |
| Presenilin 2                                          | PSEN2       | P49810     | CHEMBL3708    | Other ion channel                   | 0.112041901328 | 1 / 0                 |
| Phosphodiesterase 4B                                  | PDE4B       | Q07343     | CHEMBL275     | Phosphodiesterase                   | 0.112041901328 | 8 / 0                 |
| Phosphodiesterase 7A                                  | PDE7A       | Q13946     | CHEMBL3012    | Phosphodiesterase                   | 0.112041901328 | 6 / 0                 |
| Insulin-like growth factor I receptor                 | IGF1R       | P08069     | CHEMBL1957    | Kinase                              | 0.112041901328 | 4 / 0                 |
| Vascular endothelial growth factor receptor 2         | KDR         | P35968     | CHEMBL279     | Kinase                              | 0.112041901328 | 25 / 0                |
| Fibroblast growth factor receptor 1                   | FGFR1       | P11362     | CHEMBL3650    | Kinase                              | 0.112041901328 | 3 / 0                 |
| P-glycoprotein 1                                      | ABCB1       | P08183     | CHEMBL4302    | Primary active transporter          | 0.112041901328 | 25 / 0                |
| P2X purinoceptor 7                                    | P2RX7       | Q99572     | CHEMBL4805    | Ligand-gated ion channel            | 0.112041901328 | 8 / 0                 |
| Voltage-gated potassium channel subunit Kv1.5         | KCNA5       | P22460     | CHEMBL4306    | Voltage-gated ion channel           | 0.112041901328 | 2 / 0                 |
| Muscarinic acetylcholine receptor M2                  | CHRM2       | P08172     | CHEMBL211     | Family A G protein-coupled receptor | 0.112041901328 | 7 / 0                 |
| Muscarinic acetylcholine receptor M1                  | CHRM1       | P11229     | CHEMBL216     | Family A G protein-coupled receptor | 0.112041901328 | 13 / 0                |
| Serotonin 1d (5-HT1d) receptor (by homology)          | HTR1D       | P28221     | CHEMBL1983    | Family A G protein-coupled receptor | 0.112041901328 | 14 / 0                |
| Trace amine-associated receptor 1 (by homology)       | TAAR1       | Q96RJ0     | CHEMBL5857    | Family A G protein-coupled receptor | 0.112041901328 | 2 / 0                 |
| Leucine-rich repeat serine/threonine-protein kinase 2 | LRRK2       | Q5S007     | CHEMBL1075104 | Kinase                              | 0.112041901328 | 70 / 0                |
| Poly [ADP-ribose] polymerase-1                        | PARP1       | P09874     | CHEMBL3105    | Enzyme                              | 0.112041901328 | 17 / 0                |
| Phosphodiesterase 10A                                 | PDE10A      | Q9Y233     | CHEMBL4409    | Phosphodiesterase                   | 0.112041901328 | 58 / 0                |
| Poly [ADP-ribose] polymerase 3                        | PARP3       | Q9Y6F1     | CHEMBL5083    | Enzyme                              | 0.112041901328 | 2 / 0                 |
| Androgen Receptor (by homology)                       | AR          | P10275     | CHEMBL1871    | Nuclear receptor                    | 0.112041901328 | 64 / 0                |
| FK506-binding protein 1A                              | FKBP1A      | P62942     | CHEMBL1902    | Isomerase                           | 0.112041901328 | 3 / 0                 |
| Platelet activating factor receptor                   | PTAFR       | P25105     | CHEMBL250     | Family A G protein-coupled receptor | 0.112041901328 | 5 / 0                 |
| Sulfonylurea                                          | ABCC9       | O60706     | CHEMBL1971    | Primary active                      | 0.112041901328 | 24 / 0                |
